# Supplementary material
Source: publisher figshare collection journal article supplement (https://frontiersin.figshare.com/ndownloader/files/22043451)
Supplement: Supplementary file [file 22043451]

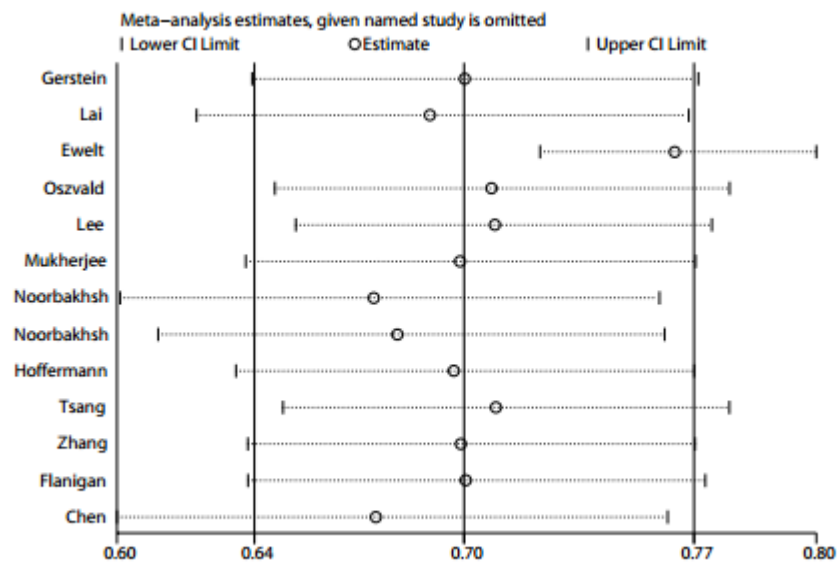

Figure S1. Sensitivity analysis for OS

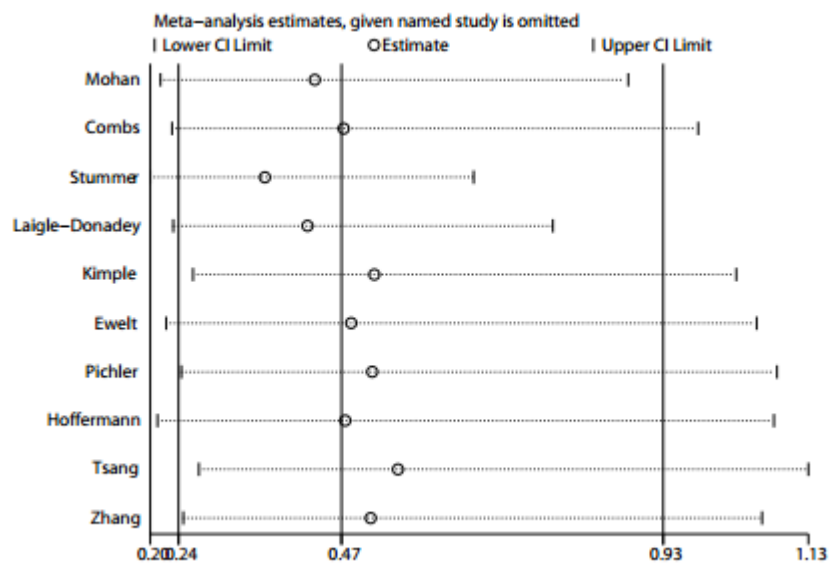

Figure S2. Sensitivity analysis for 3-month mortality

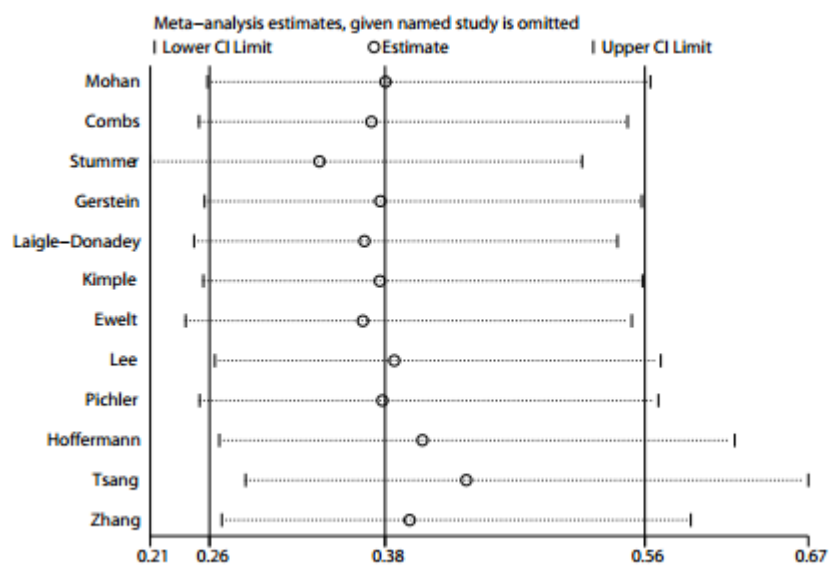

Figure S3. Sensitivity analysis for 6-month mortality

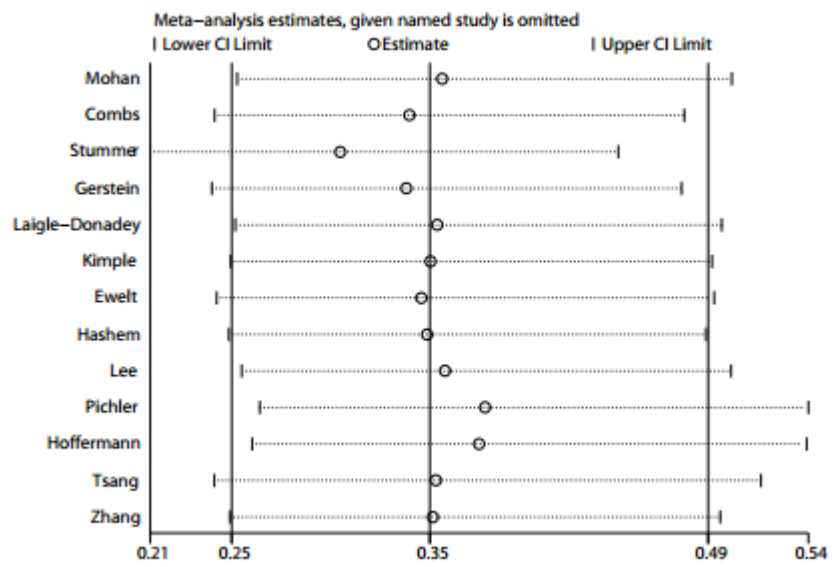

Figure S4. Sensitivity analysis for 9-month mortality

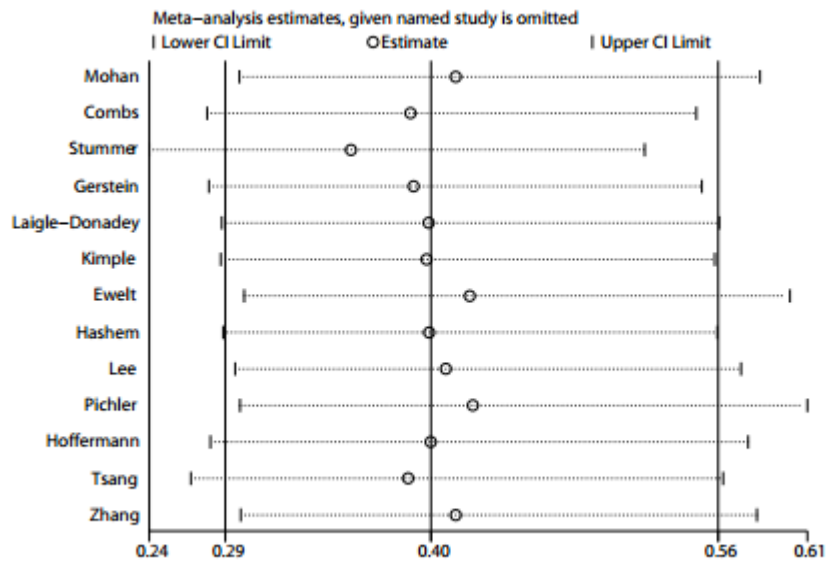

Figure S5. Sensitivity analysis for 1-year mortality
